# Supplementary material for: HIV Reactivation from Latency after Treatment Interruption Occurs on Average Every 5-8 Days—Implications for HIV Remission
Source: PLOS journal article supplement (doi:10.1371/journal.ppat.1005000), 2015-07-02
Supplement: S2 (10.1371/journal.ppat.1005000.s002) [file journal.ppat.1005000.s002]

## S2. Impact of changing initial 'seed' level of virus on the delay to detection.

Let us assume that growth of virus on initial growth phase can be described by exponential growth function:

$$V(t) = V_0 e^{gt} \quad (\text{S0.1})$$

Where  $V$  is the concentration of virus,  $V_0$  is the initial seed of virus,  $g$  –growth rate. We can rewrite the formula (S0.1) with respect to  $V_0$ .

$$\frac{V_0}{T} = \frac{1}{e^{gt}} \quad (\text{S0.2})$$

Where  $T$  is the detection threshold. Assuming that  $V_0^1$  produces delay  $t_1$  and  $V_0^2$  produces delay  $t_2$  we can write the relation between change in  $V_0$  and  $t$ .

$$\frac{V_0^1}{V_0^2} = e^{g(t_2 - t_1)} \quad (\text{S0.3})$$

Thus, we can see that the increase in time to detection by  $x = t_1 - t_2$  days requires an exponential decrease of  $V_0$  (Figure S2.1).

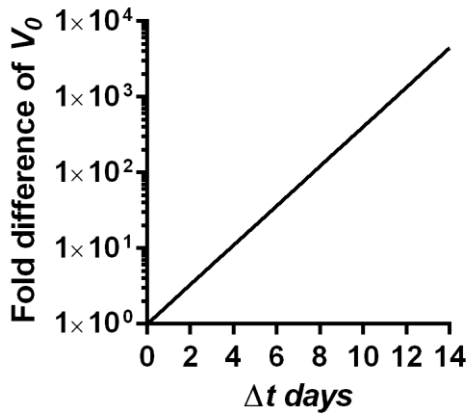

**Figure S2.1. Relationship between fold difference in the initial seed of virus  $V_0$  and increase in corresponding time to detection  $\Delta t$  . Even assuming conservative initial growth rate  $g=0.6$ , we obtain  $4.4 \times 10^3$  fold difference in  $V_0$  that is necessary to produce the delay between detection of two weeks.**
